# Supplementary material for: Corrosion process of stainless steel in natural brine as a source of chromium and iron – the need for routine analysis
Source: Royal Society of Chemistry journal article supplement (doi:10.1039/d3ra04801b), 2023-01-01
Supplement: d3ra04801b1.pdf [file d3ra04801b1.pdf]

**Corrosion process of stainless steel in natural brine as a source of chromium and iron -  
the need for routine analysis**

*Supplementary Material*

**Beata Krasnodębska-Ostręga, Krzysztof Drwal, Monika Sadowska\*, Dominika Bluszcz,  
Krzysztof Miecznikowski**

Faculty of Chemistry, University of Warsaw, Pasteura 1, 02-093 Warsaw, Poland

\*Corresponding author: [msadowska@chem.uw.edu.pl](mailto:msadowska@chem.uw.edu.pl)

**Table S1.** The results of the recovery study regarding Cr. Optimization of the sample preparation procedure was based on the results of UV-Vis determination of Cr in brine spiked with Cr(III) and/or Cr(VI) standard solutions.

*Extraction:* to extract total chromium, it was first oxidized to Cr(VI) by  $\text{KMnO}_4$  in the presence of  $0.1 \text{ mol L}^{-1} \text{ H}_2\text{SO}_4$ . The solution was heated in a boiling water bath ( $T=100^\circ\text{C}$ ). Then, the samples were acidified with HCl to obtain the final concentration of 2 or  $3 \text{ mol L}^{-1}$ , and 15.0 mL of the sample was placed in a separating funnel. Cr(VI) was extracted with three portions (5.0 mL each) of 4-methyl-2-pentanone at a temperature below  $10^\circ\text{C}$ , and next re-extracted with three portions of deionized water (5.0 mL) at room temperature.

*Thermal chloride stripping:* concentrated  $\text{H}_2\text{SO}_4$  was added to the sample in an amount that allowed to obtain the final concentration (after evaporation and dilution) within the range of  $0.05\text{-}0.1 \text{ mol L}^{-1}$ . The sample was then heated to approximately  $210^\circ\text{C}$  until characteristic white fumes were observed. After cooling and dilution with DI water,  $\text{KMnO}_4$  solution was added to oxidize chromium to Cr(VI).

*Thermal chloride stripping (without  $\text{KMnO}_4$ ):* the oxidation step with  $\text{KMnO}_4$  was omitted. In this experiment, the preparation of the samples was limited to chloride stripping with sulphuric acid only.

| Sample                                                | Concentration of Cr [ $\mu\text{g mL}^{-1}$ ] |            | Recovery [%] |
|-------------------------------------------------------|-----------------------------------------------|------------|--------------|
|                                                       | added                                         | determined |              |
| <b>Preliminary study – no sample preparation</b>      |                                               |            |              |
| therapeutic brine (diluted 10x) spiked                | 0.100                                         | 0.059      | 59           |
| with Cr(VI)                                           | 0.100                                         | 0.090      | 90           |
| therapeutic brine (diluted 100x) spiked               | 0.100                                         | 0.084      | 84           |
| with Cr(VI)                                           | 0.100                                         | 0.097      | 97           |
| <b>Extraction</b>                                     |                                               |            |              |
| model brine spiked with Cr(VI),                       | 0.500                                         | 0.340      | 68           |
| 2 mol L <sup>-1</sup> HCl                             | 0.500                                         | 0.381      | 76           |
|                                                       | 0.500                                         | 0.420      | 84           |
|                                                       | 0.500                                         | 0.340      | 68           |
|                                                       | 0.500                                         | 0.340      | 68           |
|                                                       | 0.500                                         | 0.390      | 78           |
| model brine spiked with Cr(VI), 3 mol L <sup>-1</sup> | 0.500                                         | 0.251      | 50           |
| HCl                                                   |                                               |            |              |
| model brine spiked with Cr(III),                      | 0.500                                         | 0.634      | 127          |
| 2 mol L <sup>-1</sup> HCl                             | 0.500                                         | 0.629      | 126          |
|                                                       | 0.500                                         | 0.530      | 106          |
|                                                       | 0.500                                         | 0.527      | 105          |
|                                                       | 0.500                                         | 0.496      | 99           |
|                                                       | 0.500                                         | 0.338      | 68           |
|                                                       | 0.500                                         | 0.411      | 82           |
| <b>Thermal chloride stripping</b>                     |                                               |            |              |
| model brine spiked with Cr(III)                       | 0.500                                         | 0.458      | 92           |
|                                                       | 0.500                                         | 0.338      | 68           |
|                                                       | 0.500                                         | 0.414      | 83           |
|                                                       | 0.500                                         | 0.389      | 78           |
| model brine spiked with Cr(VI)                        | 0.500                                         | 0.592      | 118          |
|                                                       | 0.500                                         | 0.598      | 120          |
|                                                       | 0.500                                         | 0.592      | 118          |
|                                                       | 0.500                                         | 0.572      | 114          |

| <b>Thermal chloride stripping (without KMnO<sub>4</sub>)</b> |       |       |    |
|--------------------------------------------------------------|-------|-------|----|
| model brine spiked with Cr(III)                              | 0.500 | < LOD | 0  |
|                                                              | 0.500 | < LOD | 0  |
|                                                              | 0.500 | < LOD | 0  |
| model brine spiked with Cr(VI)                               | 0.500 | 0.015 | 3  |
|                                                              | 0.500 | 0.072 | 14 |
|                                                              | 0.500 | 0.157 | 31 |
|                                                              | 0.500 | 0.189 | 38 |

**Table S2.** The results of the recovery study regarding Fe. Optimization of the sample preparation procedure was based on the results of UV-Vis determination of Fe in water and brine spiked with Fe standard solution.

Iron was extracted from the sample using 4-methyl-2-pentanone (hexone), re-extracted with 0.1 mol L<sup>-1</sup> HCl and determined using spectrophotometry after addition of sulfosalicylic acid. Standard solutions of Cr(III) and Cr(VI) were added to test the method for interferences. The concentration of each element was 2 mg L<sup>-1</sup>, and Fe was determined without prior extraction.

| Sample                                 | Concentration of Fe [ $\mu\text{g mL}^{-1}$ ] |            | Recovery [%] |
|----------------------------------------|-----------------------------------------------|------------|--------------|
|                                        | added                                         | determined |              |
| DI water spiked with Fe                | 2.00                                          | 1.70       | 85           |
|                                        | 2.00                                          | 1.80       | 90           |
|                                        | 2.00                                          | 1.84       | 92           |
| model brine spiked with Fe             | 2.00                                          | 1.87       | 94           |
|                                        | 2.00                                          | 1.88       | 94           |
|                                        | 2.00                                          | 1.84       | 92           |
|                                        | 2.00                                          | 1.85       | 93           |
|                                        | 2.00                                          | 1.81       | 91           |
|                                        | 2.00                                          | 1.71       | 86           |
|                                        | 2.00                                          | 1.80       | 90           |
| DI water spiked with Fe                | 2.00                                          | 1.91       | 96           |
| DI water spiked with Fe and Cr(III)    | 2.00                                          | 1.96       | 98           |
| 1:1                                    |                                               |            |              |
| DI water spiked with Fe and Cr(VI)     | 2.00                                          | 2.15       | 108          |
| 1:1                                    |                                               |            |              |
| model brine spiked with Fe and Cr(VI)  | 2.00                                          | 1.85       | 93           |
| 1:1                                    | 2.00                                          | 1.64       | 82           |
| model brine spiked with Fe and Cr(III) | 2.00                                          | 1.85       | 93           |
| 1:1                                    | 2.00                                          | 1.83       | 92           |
